# Supplementary material for: Precipitation measurement intercomparison in the Qilian Mountains, north-eastern Tibetan Plateau
Source: Copernicus journal article supplement (doi:10.5194/tc-9-1995-2015), 2015-10-28
Supplement: Supplementary file 1 [file tc-9-1995-2015-supplement.zip]

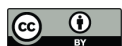

## *Supplement of*

# **Precipitation measurement intercomparison in the Qilian Mountains, north-eastern Tibetan Plateau**

**R. Chen et al.**

*Correspondence to:* R. Chen (crs2008@lzb.ac.cn)

- tc-9-1995-2015-supplement-title-page.pdf
- Data update to April 30 2015.xlsx

The copyright of individual parts of the supplement might differ from the CC-BY 3.0 licence.
